# Supplementary material for: Effect of cytomegalovirus reactivation on the time course of systemic host response biomarkers in previously immunocompetent critically ill patients with sepsis: a matched cohort study
Source: Springer Nature journal article supplement (doi:10.1186/s13054-018-2261-0), 2018-12-01
Supplement: MOESM1 [file 16350482]

## SUPPLEMENTAL DIGITAL CONTENT

### **Effect of cytomegalovirus reactivation on the time course of systemic host response biomarkers in previously immunocompetent critically ill patients with sepsis : a matched cohort study**

Kirsten van de Groep<sup>1,2</sup>, Stefan Nierkens<sup>3</sup>, Olaf L. Cremer<sup>2</sup>, Linda M. Peelen<sup>1,2</sup>, Peter M.C. Klein Klouwenberg<sup>7</sup>, Marcus J. Schultz<sup>4</sup>, C. Erik Hack<sup>3</sup>, Tom van der Poll<sup>5,6</sup>, Marc J.M. Bonten<sup>7</sup>, David S.Y. Ong<sup>1,8</sup>, *on behalf of the MARS consortium.*

#### **Content:**

- Appendix I. Table S1. Absolute levels of host response markers during follow up by CMV reactivation status
- Appendix II. Figure S1. Symmetric percentage differences for time trends of host response biomarkers in patients by CMV reactivation status (secondary comparison)

## APPENDIX I.

**Table S1. Absolute levels of host response markers during follow up by CMV reactivation status**

| Cytokine                                                   | Primary Comparison |                   |         | Secondary Comparison |                   |         |
|------------------------------------------------------------|--------------------|-------------------|---------|----------------------|-------------------|---------|
|                                                            | CMVs+              | CMV+ <sup>a</sup> | p-value | CMVs-                | CMV+ <sup>a</sup> | p-value |
| <b>Three days after CMV reactivation (t=3)<sup>b</sup></b> |                    |                   |         |                      |                   |         |
|                                                            | n=26               | n=26              |         | n=29                 | n=23              |         |
| IL-6                                                       | 3.6 (3.1-4.5)      | 3.8 (3.1-4.9)     | 0.86    | 4.2 (3.6-4.7)        | 3.6 (2.7-4.2)     | 0.12    |
| IL-8                                                       | 3.1 (2.6-3.7)      | 3.3 (2.4-4.3)     | 0.69    | 3.3 (2.8-4.6)        | 3.3 (2.3-4.3)     | 0.35    |
| IL-18                                                      | 6.1 (5.7-6.7)      | 6.1 (5.8-6.8)     | 0.85    | 6.1 (5.8-6.5)        | 6.1 (5.8-6.7)     | 0.92    |
| IP-10                                                      | 6.5 (5.9-6.9)      | 6.5 (6.0-6.9)     | 0.63    | 6.3 (6.0-6.9)        | 6.6 (6.0-7.4)     | 0.22    |
| N-elastase                                                 | 10.3 (10.1-10.9)   | 10.4 (10.1-10.9)  | 0.56    | 10.5 (10.2-10.8)     | 10.4 (10.0-11.0)  | 0.73    |
| IL-10                                                      | 2.1 (1.1-2.4)      | 2.6 (1.7-3.0)     | 0.06    | 2.2 (1.6-2.6)        | 2.6 (1.6-3.0)     | 0.15    |
| IL-1RA                                                     | 6.4 (5.8-6.8)      | 6.5 (5.9-6.9)     | 0.87    | 6.3 (5.8-7.0)        | 6.6 (5.9-6.9)     | 0.96    |
| <b>Seven days after CMV reactivation (t=7)</b>             |                    |                   |         |                      |                   |         |
|                                                            | n=14               | n=15              |         | n=19                 | n=13              |         |
| IL-6                                                       | 3.9 (3.2-4.4)      | 3.8 (3.0-4.4)     | 0.66    | 4.1 (3.7-5.1)        | 3.4 (3.0-4.0)     | 0.005   |
| IL-8                                                       | 3.4 (2.6-3.5)      | 3.5 (2.7-4.1)     | 0.28    | 3.8 (3.0-5.1)        | 3.5 (2.7-4.0)     | 0.26    |
| IL-18                                                      | 6.0 (5.6-6.4)      | 6.3 (5.9-6.8)     | 0.29    | 6.3 (5.9-6.7)        | 6.3 (5.9-6.8)     | 0.95    |
| IP-10                                                      | 6.2 (5.9-6.6)      | 6.4 (6.2-6.8)     | 0.32    | 6.6 (5.8-7.2)        | 6.6 (6.3-6.9)     | 0.55    |
| N-elastase                                                 | 10.2 (9.8-10.7)    | 10.5 (10.4-10.7)  | 0.19    | 10.3 (9.9-10.9)      | 10.6 (10.4-11.0)  | 0.39    |
| IL-10                                                      | 1.7 (0.7-1.8)      | 2.3 (1.8-2.7)     | 0.03    | 2.0 (1.4-2.6)        | 2.3 (1.9-2.7)     | 0.45    |
| IL-1RA                                                     | 6.2 (3.7-6.4)      | 6.2 (4.7-6.7)     | 0.84    | 6.5 (6.0-7.1)        | 5.9 (3.1-6.4)     | 0.07    |
| <b>Ten days after CMV reactivation (t=10)</b>              |                    |                   |         |                      |                   |         |
|                                                            | n=11               | n=11              |         | n=15                 | n=11              |         |
| IL-6                                                       | 3.7 (3.1-5.0)      | 4.7 (3.4-5.3)     | 0.22    | 4.4 (3.6-4.8)        | 4.2 (2.9-4.7)     | 0.36    |
| IL-8                                                       | 3.2 (2.5-3.8)      | 3.6 (2.0-4.4)     | 0.87    | 3.8 (2.8-4.8)        | 3.6 (2.0-4.4)     | 0.31    |
| IL-18                                                      | 6.1 (5.0-6.5)      | 6.4 (6.0-6.6)     | 0.31    | 6.4 (6.2-6.7)        | 6.2 (5.9-6.6)     | 0.55    |
| IP-10                                                      | 6.2 (5.8-6.9)      | 6.8 (6.1-7.2)     | 0.34    | 6.3 (5.7-7.3)        | 7.1 (6.3-7.4)     | 0.24    |
| N-elastase                                                 | 10.4 (9.8-10.5)    | 10.4 (9.8-11.0)   | 0.49    | 10.5 (9.9-10.8)      | 10.6 (9.8-11.1)   | 0.70    |
| IL-10                                                      | 1.6 (1.0-2.0)      | 2.7 (1.8-3.1)     | 0.002   | 1.8 (1.5-3.1)        | 2.7 (1.7-3.1)     | 0.45    |
| IL-1RA                                                     | 3.1 (3.1-6.2)      | 6.2 (5.8-6.7)     | 0.19    | 6.2 (5.1-6.9)        | 5.8 (3.1-6.3)     | 0.48    |

CMVs+: cytomegalovirus (CMV) seropositive without reactivation. CMV+: CMV reactivation. CMVs-: CMV seronegative. IL: interleukin. IP=interferon- $\gamma$  induced protein. N: neutrophilic. RA: receptor antagonist. Biomarker levels (pg/mL) were natural log transformed and presented as median (Q1-Q3). Due to ICU discharge or death sample size decreased over time to a minimum of 11 patients per group after ten days.

<sup>a</sup> 28 patients with CMV reactivation are included in both matched comparisons.

<sup>b</sup> t=0 is the ICU day of CMV reactivation, this length of stay also determines t=0 in the matched patient without reactivation.

**APPENDIX II.**

**Figure S1. Symmetric percentage differences for time trends of host response biomarkers in patients by CMV reactivation status (secondary comparison)**

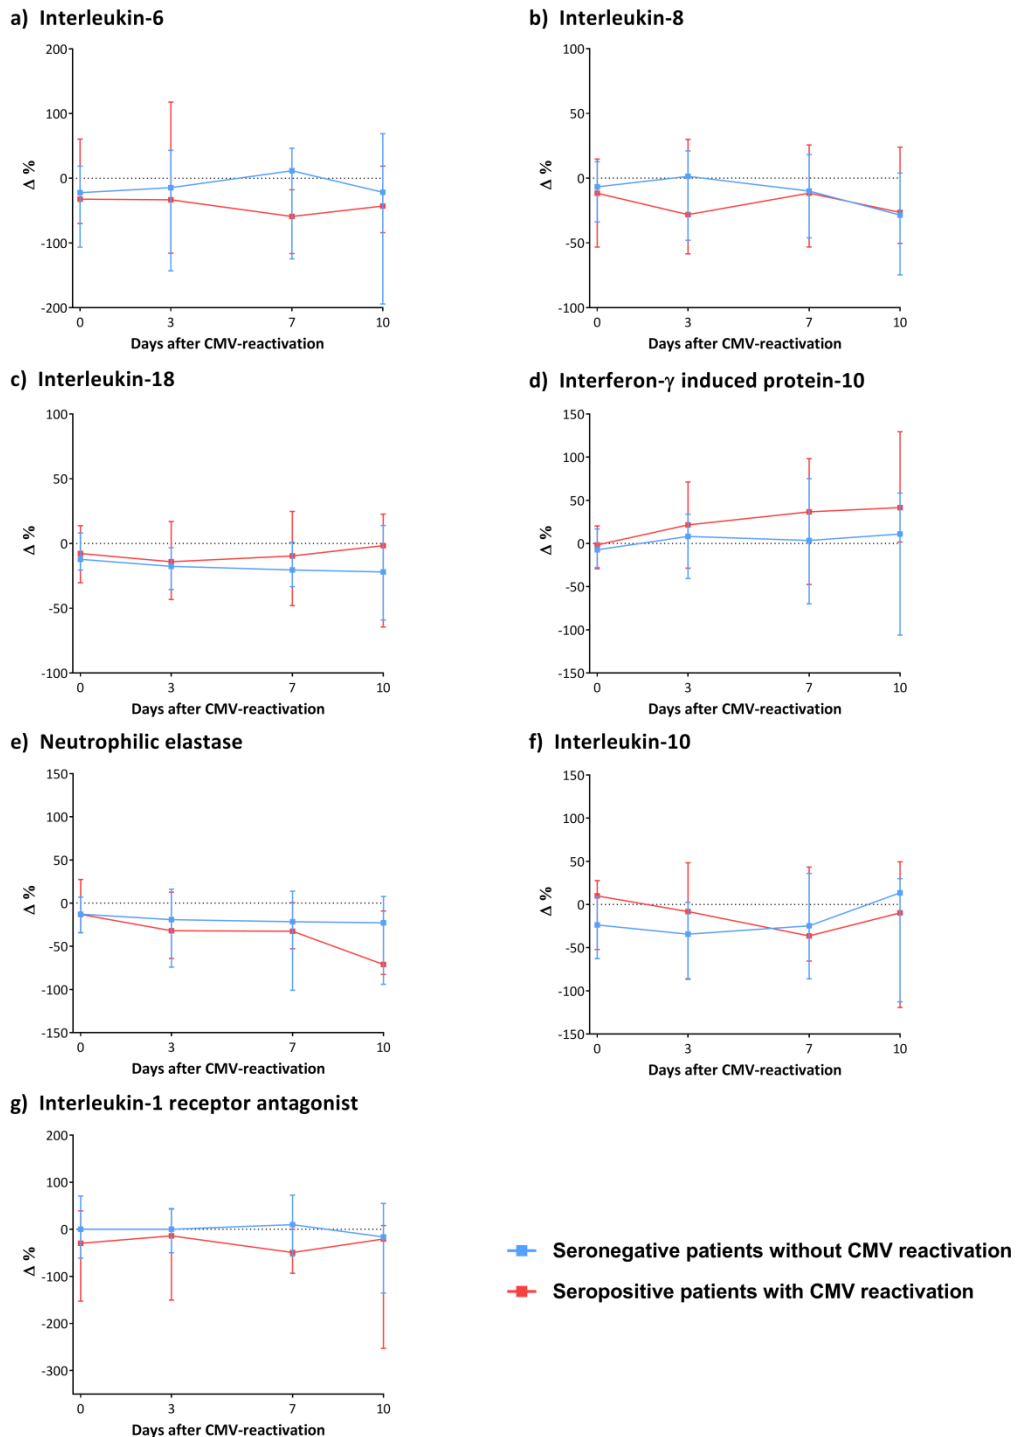

Levels (pg/mL) of pro-inflammatory (figure a-e) and anti-inflammatory biomarkers (figure f-g) were natural log transformed and symmetric percentage differences were calculated;  $\Delta \% = (\ln(\text{value follow up measurement}) - \ln(\text{value at } t=-2)) * 100$ . This measure reflects the relative difference from baseline up to the time point of interest. Results are presented as median percentage difference and Q1-Q3. Loss to follow up (death or ICU discharge) decreased the sample size with a minimum of 11 patients per group after 10 days.
